# Supplementary material for: Nox4 promotes endothelial differentiation through chromatin remodeling
Source: PubMed Central journal article supplement — Redox Biol. 2022 Jul 6;55:102381. doi: 10.1016/j.redox.2022.102381 (PMC9287364; doi:10.1016/j.redox.2022.102381), 2022-07-06
Supplement: mmc1.pdf [file mmc1.pdf]

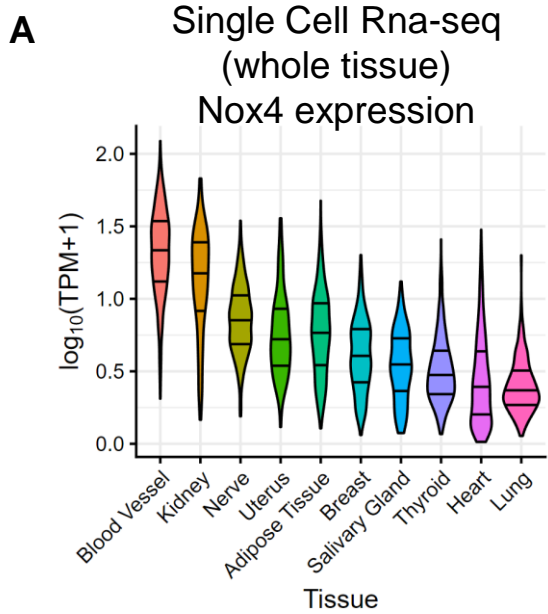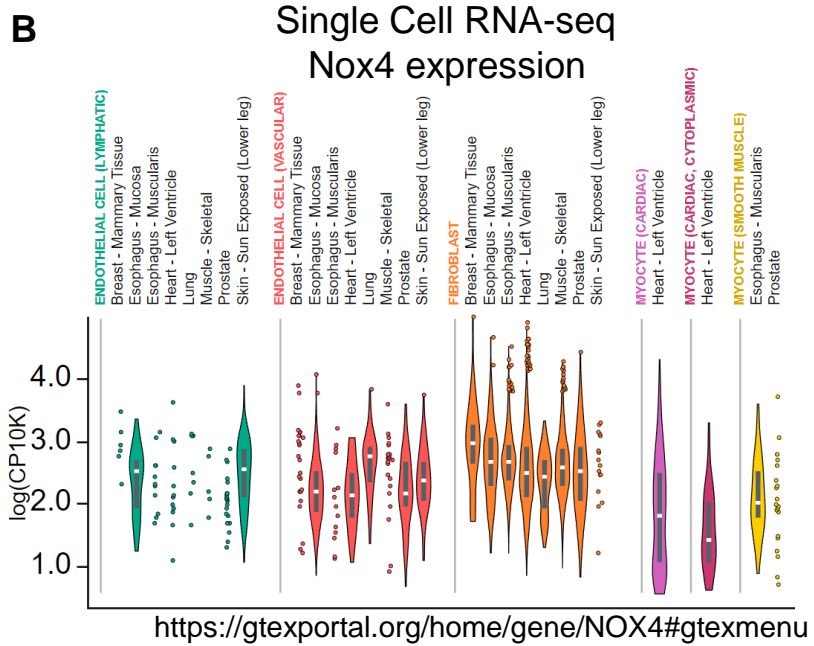

**C** hiPSC to endothelial differentiation Belt et al. (2018)

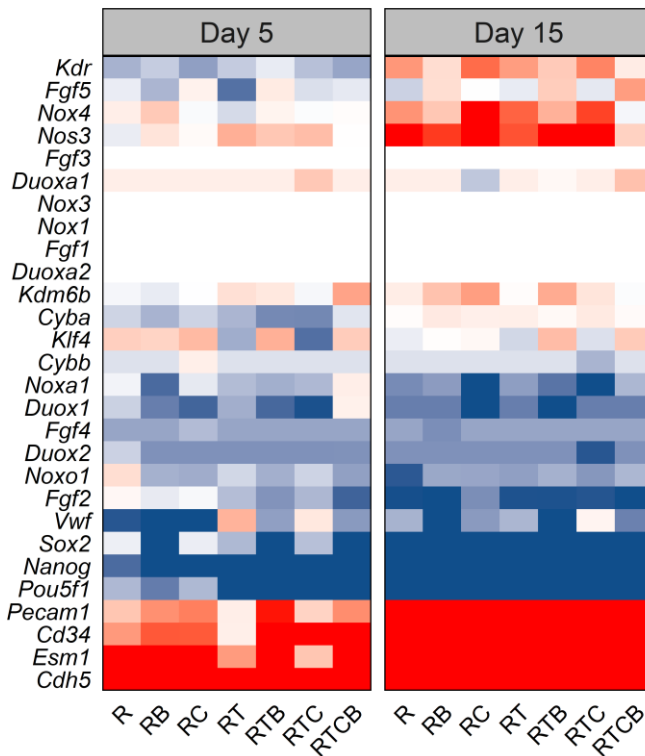

**Supplement Figure 1. Nox4 is highly expressed in vascular tissue, endothelial cells & expression increases in endothelial differentiation** (A) Bulk RNA sequencing data from GTEx database indicating Nox4 is highly expressed in blood vessels. (B) GTEx Single Cell RNA sequencing indicating Nox4 highest expression in endothelial cells (C) RNA-Sequencing data adapted and re-analysed from Belt et al. A Heatmap of differentially expressed NADPH oxidase isoforms, endothelial markers & stemness markers in different differentiation conditions on Day 5 & 15, displayed as log<sub>2</sub>fc normalised on iPSC control. Supplements used by Belt et al.: R=Rock inhibitor, RB=Rock inhibitor/BMP4, RC=Rock inhibitor/cyclic-amp, RT=Rock inhibitor/ TGF inhibitor, RTB=Rock inhibitor/TGF inhibitor/BMP4, RTC=Rock inhibitor/TGF inhibitor/cyclic-amp, RTCB=Rock inhibitor/TGF inhibitor/cyclic-amp/BMP4.

**A**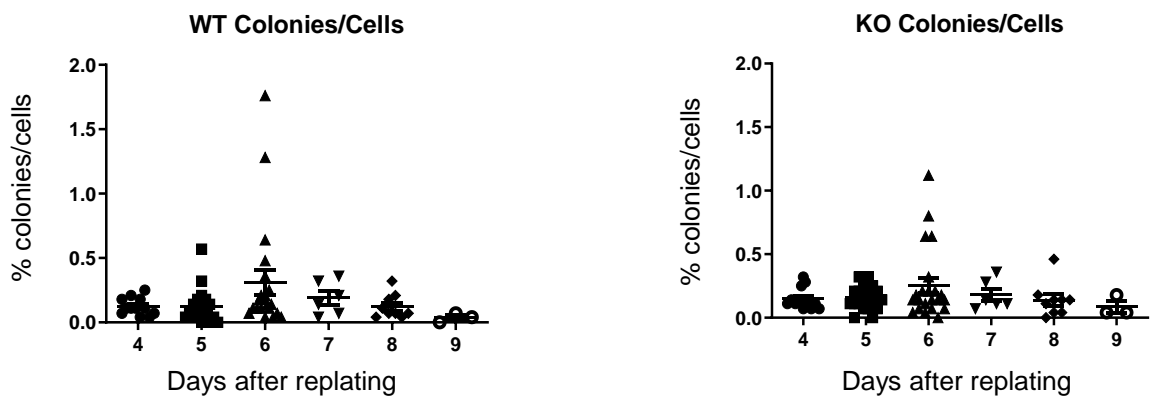**B**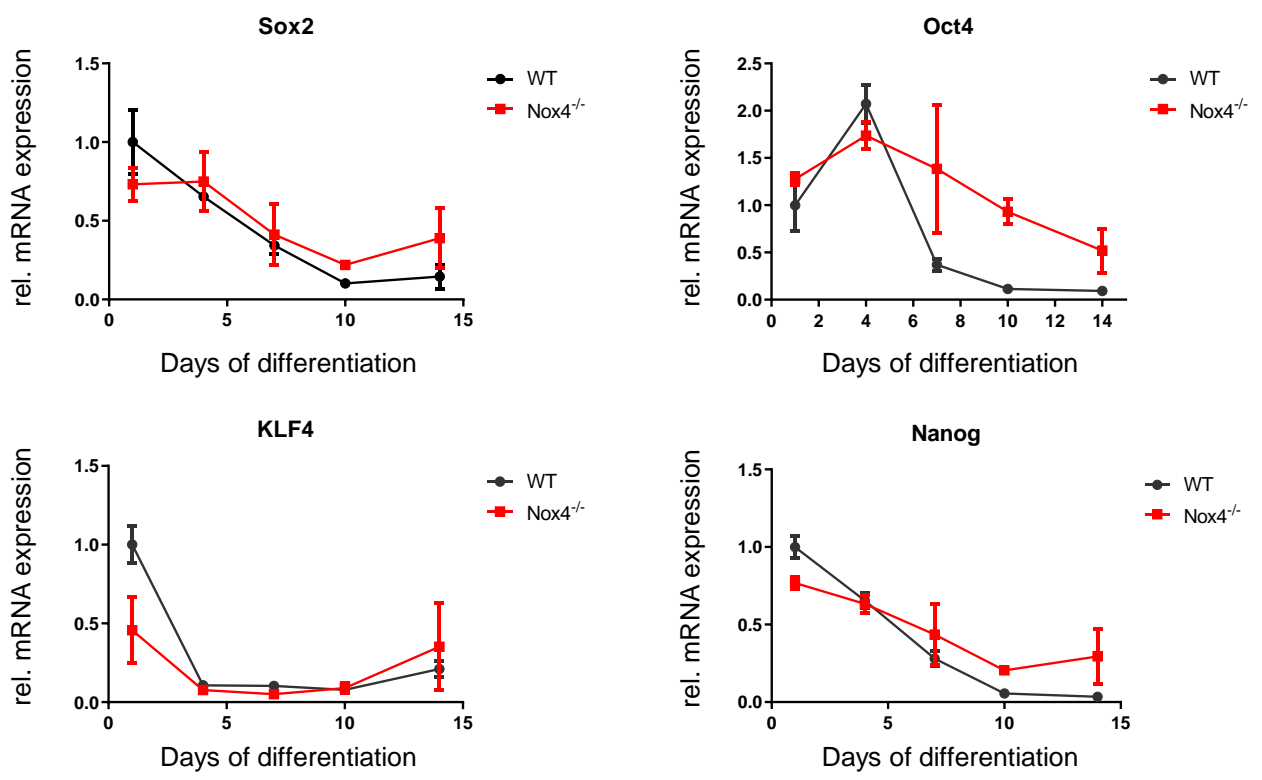**C**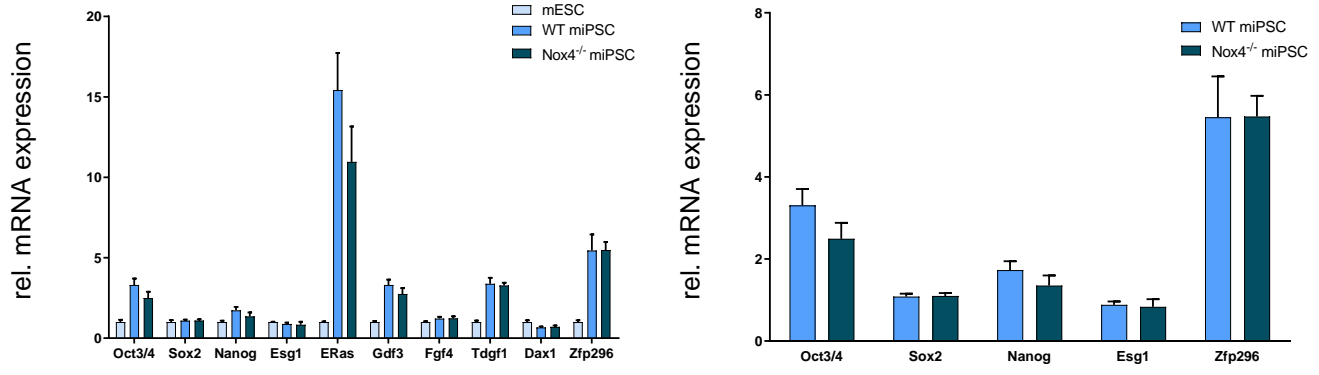

**Supplement Figure 2. Comparison of mESC vs. miPSC.** (A) Reprogramming efficiency shows no difference between WT & Nox4<sup>-/-</sup>. (B) Stem cell genes decrease expression in the course of differentiation (n=3). (C) qPCR indicating no difference in stem cell marker expression between mESC & miPSC (n=2-5) (left panel) and no difference between WT & Nox4<sup>-/-</sup> (n=4) (right panel).

A

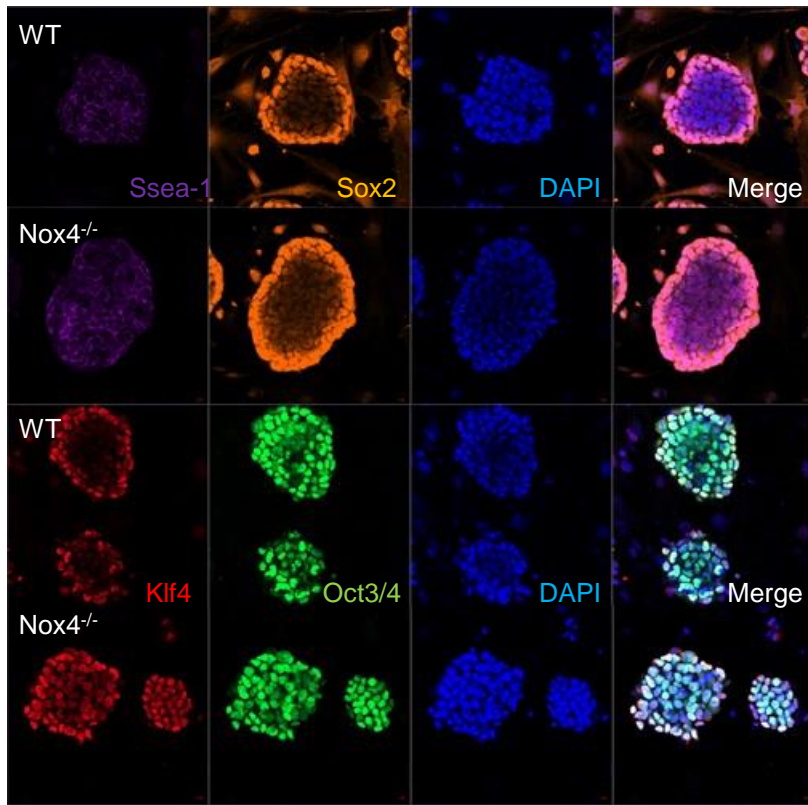

B

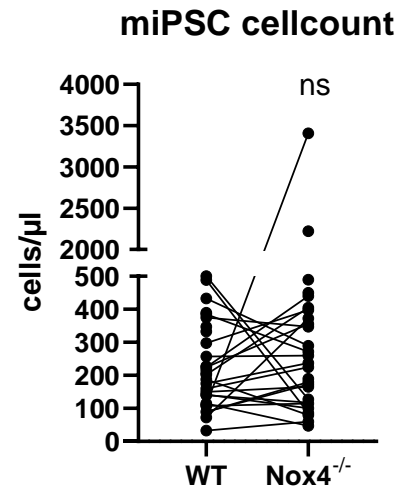

**Supplement Figure 3. miPSC WT vs Nox4<sup>-/-</sup> comparison** (A) Representative immunofluorescence staining of stem cell markers in WT & KO miPSC. (B) No Proliferation differences between WT & Nox4 knockout (comparing 33 passages).

## A time scale of forced in vitro endothelial differentiation

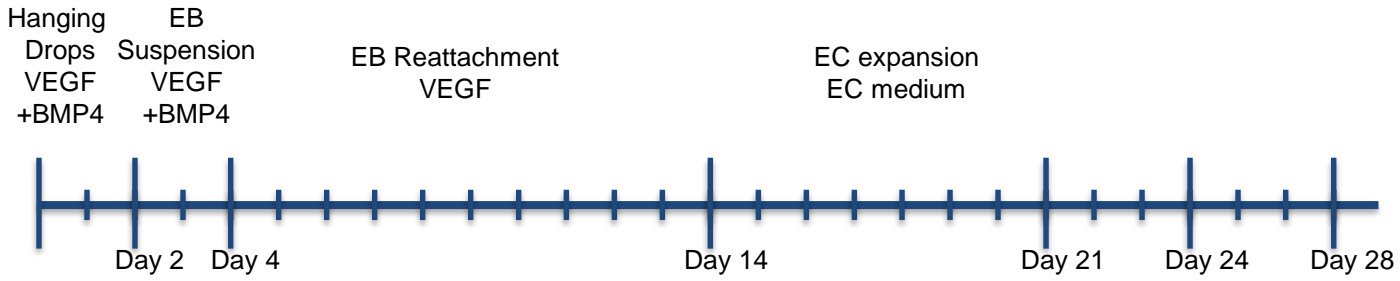

## A mRNA expression of Nox2 and Kdr (VEGFR2)

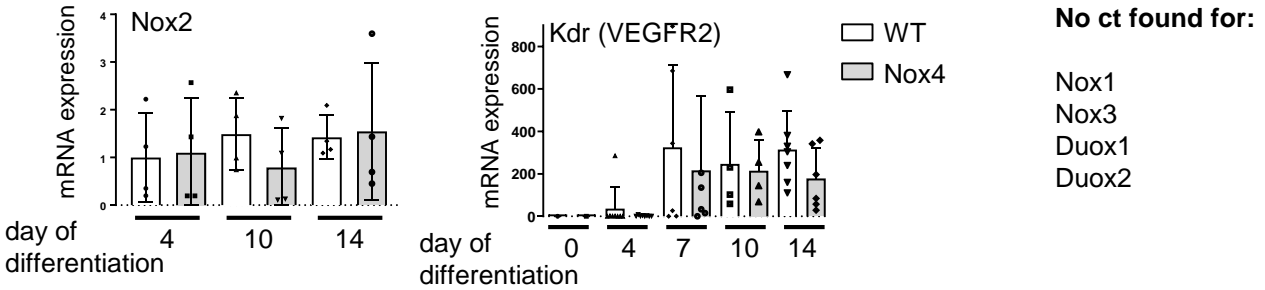

**Supplement Figure 4:** (A) time scale of forced in vitro endothelial differentiation; (B) Nox2 and Kdr mRNA expression in the course of differentiation. Real-time qPCR for Nox2 and Kdr. . (n=5-7)

A

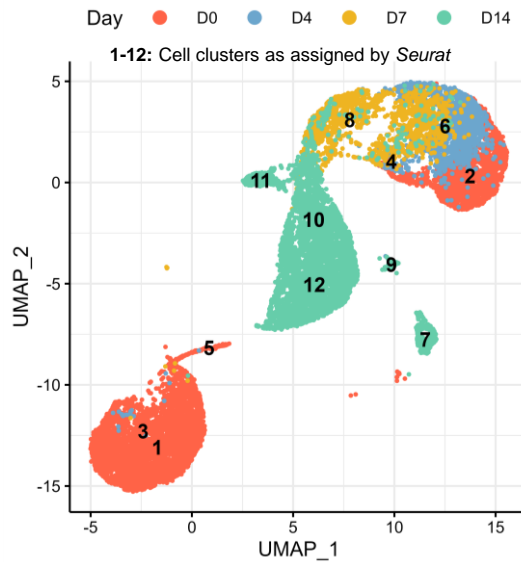

B

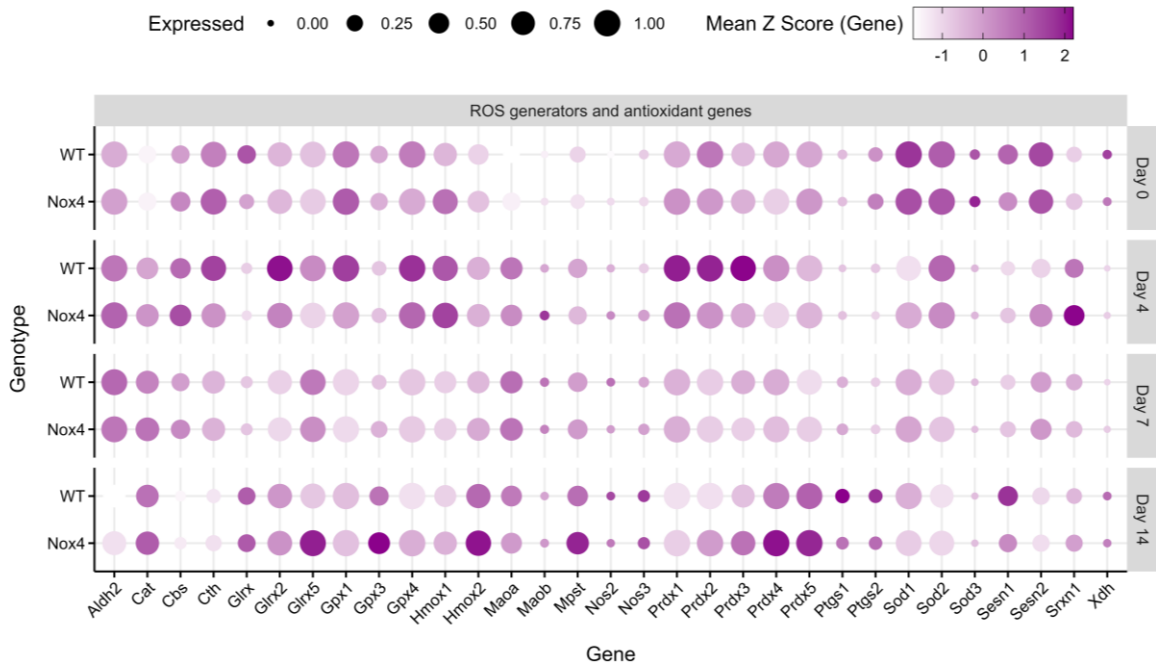

C

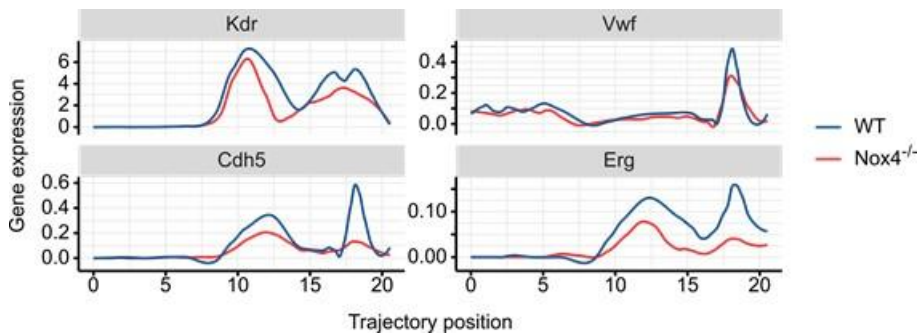

**Supplement Figure 5. UMAP plot with excluded Feeder clusters & ROS related genes in course of differentiation.** (A) Uniform manifold approximation and projection (UMAP) plots of cells at days 0, 4, 7 and 14 of differentiation from induced pluripotent stem cells to endothelial cells, including Feeder (fibroblasts) in Cluster 1,3,5. (B) Percentages of wild-type and Nox4-knockout cells from each day of differentiation expressing subsets of marker genes for ROS generation and antioxidants, in combination with Z-score normalised expression of each gene across all cells. (C) Normalised expression of *Kdr*, *Vwf*, *Cdh5* and *Erg* along the trajectory of endothelial differentiation in Nox4-knockout and wild-type cells.

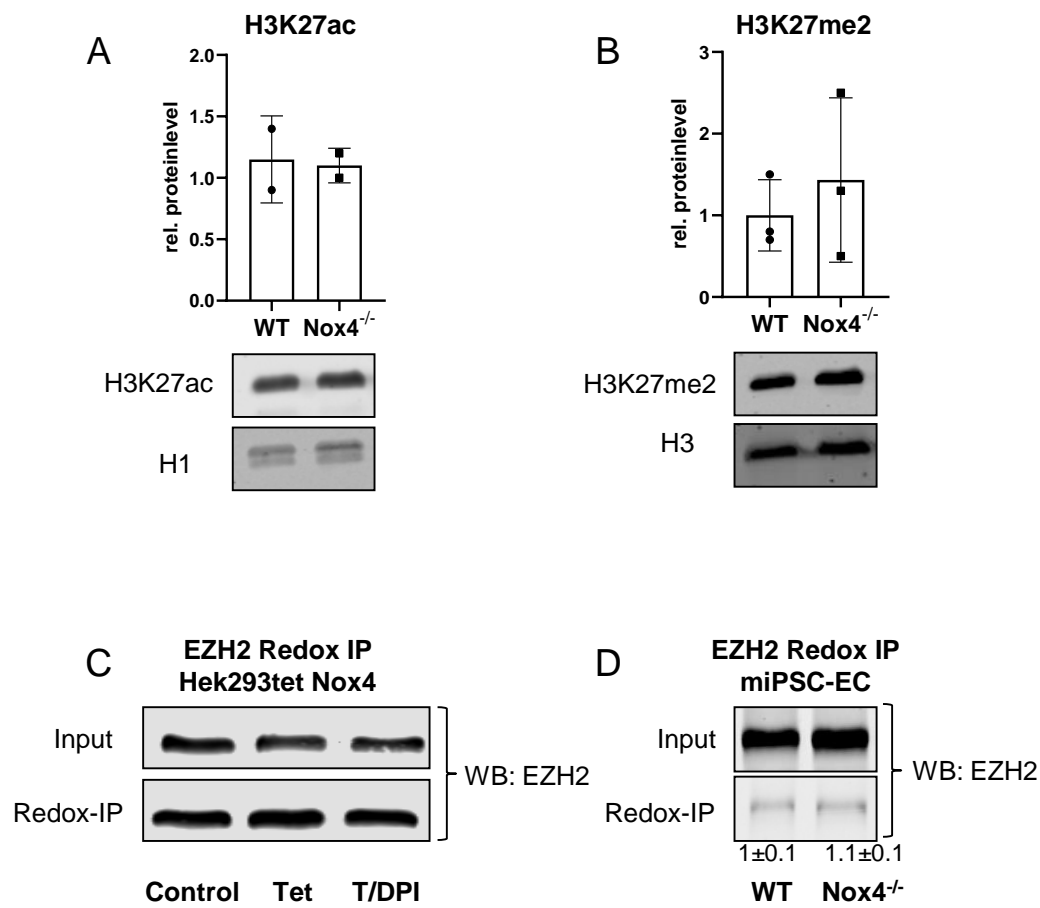

**Supplement figure 6. Abundance of chromatin marks and oxidation state of methyltransferase.** (A) Western Blot for H3K27ac & me2 in WT vs. Nox4<sup>-/-</sup> (n=2-3). (B) BIAM switch redox assay of EZH2 in Nox4 overexpressing human embryonic kidney cell, Tetracyclin 1µg/ml, 24h, DPI 3 µM, 3h. (C) BIAM switch redox assay of EZH2 indicates no difference in oxidation state in WT miPSC-ECs vs Nox4<sup>-/-</sup>.
